# Supplementary material for: Speciation and dynamics of dissolved inorganic nitrogen export in the Danshui River, Taiwan
Source: Copernicus journal article supplement (doi:10.5194/bg-11-5307-2014), 2014-10-02
Supplement: Supplementary file 1 [file bg-11-5307-2014-supplement.pdf]

Supplement of Biogeosciences, 11, 5307–5321, 2014  
<http://www.biogeosciences.net/11/5307/2014/>  
doi:10.5194/bg-11-5307-2014-supplement  
© Author(s) 2014. CC Attribution 3.0 License.

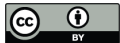

*Supplement of*

## **Speciation and dynamics of dissolved inorganic nitrogen export in the Danshui River, Taiwan**

**T.-Y. Lee et al.**

*Correspondence to:* J.-C. Huang ([riverhuang@ntu.edu.tw](mailto:riverhuang@ntu.edu.tw))

## 1 **Supplementary**

2  
3 Flux is defined as the movement of mass over time through a defined cross-sectional area, and  
4 can be derived by the product of measured concentrations and discharge. It will not be a problem if  
5 continuous measured concentration and discharge is available. However, the measured concentration  
6 is often discrete. Therefore, flux estimators are often used to overcome the situation, but  
7 uncertainties will inevitably arise due to sampling frequency, hydrological behaviors, and hydrologic  
8 response. Four method-derived fluxes at each site were averaged and normalized by drainage area to  
9 derive flux and yield, respectively, to reduce the uncertainties.

10 The linear interpolation (LI) method interpolates the unsampled daily DIN concentrations by  
11 two adjacent measured DIN concentrations, as shown in Equation 1. The main merit of this method  
12 is to supplement the discrete DIN concentration to pair with the consecutive discharge records  
13 (Moatar and Meybeck, 2005).

$$14 \quad FLUX = m \sum_{j=1}^T C_j^{int} \times Q_j \quad (\text{Equation 1})$$

15 Where FLUX is annual DIN load (kg/yr);  $C_j^{int}$  is the DIN concentration on  $j^{\text{th}}$  day linearly  
16 interpolated between two measured samples ( $\mu\text{M}$ );  $Q_j$  is the monitored daily discharge ( $\text{m}^3/\text{sec}$ );  $m$  is  
17 the conversion factor to convert the calculated values into a specific unit (kg/yr).  $T$  stands for the  
18 number of days of the studied period, which is a year for this study.

19 Another method, global mean (GM) method, is to multiply the average concentration of all  
20 samples by the total discharge within the study period, as shown in Equation 2 (Birgand et al., 2010).

$$21 \quad FLUX = m \frac{\sum_{i=1}^n C_i}{n} \times Q_t \quad (\text{Equation 2})$$

22 Where  $C_i$  is the DIN concentration of the water sample ( $\mu\text{M}$ );  $Q_t$  is the annual total discharge  
23 ( $\text{m}^3/\text{yr}$ ); and  $n$  is the number of DIN samples in a year. This method does not yet take the hydrological

24 responses into account, which could be applied to the remote area where runoff is not available but  
25 could be roughly estimated by annual rainfall.

26 The flow weighted (FW) method which weighs the sampled concentration by discharge for  
27 considering the hydrological responses, is also widely used as shown in Equation 3. Annual DIN flux  
28 equals the annual discharge volume multiplied by the flow-weighted DIN concentration (Ferguson,  
29 1987).

$$30 \quad FLUX = m \frac{\sum_{i=1}^n (C_i Q_i)}{\sum_{i=1}^n Q_i} \times Q_t \quad (\text{Equation 3})$$

31 Where  $Q_i$  ( $\text{m}^3/\text{sec}$ ) is the corresponding discharge on the discrete sampling day.

32 The rating curve (RC) method has been widely used in small mountainous rivers with highly  
33 fluctuating hydrodynamic range (Kao and Liu, 2000; Kao et al., 2004; Hung et al., 2012b; Lee et al.,  
34 2013). A straight line is first fitted to the logarithms of observed DIN and discharge to get  $a$  and  $b$   
35 (Equation 4). Then the continuous daily discharge could be substituted into the equation to estimate  
36 daily DIN flux.

$$37 \quad FLUX = m \sum_{j=1}^T (Q_j C_j) = m \sum_{j=1}^T [Q_j (a Q_j^b)] = m \sum_{j=1}^T a Q_j^{b+1} \quad (\text{Equation 4})$$

38 Where  $Q_j$  ( $\text{m}^3/\text{s}$ ) is the daily water discharge;  $C_j$  ( $\mu\text{M}$ ) is an estimated DIN concentration on the  $j^{\text{th}}$   
39 day. Yield denotes the flux divided by the watershed area.
